1 **Zika virus infection in Collaborative Cross mice**

2

3 Melissa D. Mattocks<sup>1</sup>, Kenneth S. Plante<sup>2#</sup>, Ethan J. Fritch<sup>1</sup>, Ralph S. Baric<sup>3</sup>, Martin T. Ferris<sup>2</sup>,  
4 Mark T. Heise<sup>2</sup>, Helen M. Lazear<sup>1\*</sup>

5

6 Departments of Microbiology & Immunology<sup>1</sup>, Genetics<sup>2</sup>, Epidemiology<sup>3</sup>, University of North  
7 Carolina at Chapel Hill

8

9 #Present address: University of Texas Medical Branch

10

11 \*Corresponding author: [helen.lazear@med.unc.edu](mailto:helen.lazear@med.unc.edu)

12

13 **Abstract**

14

15 The 2015-2016 emergence of Zika virus (ZIKV) in the Americas, and recognition that ZIKV  
16 infection during pregnancy can result in birth defects, revealed a need for small animal models to  
17 study ZIKV pathogenic mechanisms and evaluate candidate vaccines and antivirals. Mice would  
18 be an attractive system for such studies, but ZIKV replicates poorly in laboratory mice because it  
19 fails to antagonize murine STAT2 and STING. To address this, most ZIKV pathogenesis studies  
20 have used mice with impaired interferon signaling (e.g. *Ifnar1*<sup>-/-</sup> or treatment with IFNAR1-blocking  
21 antibodies). However, using mice with severe defects in innate antiviral signaling confounds  
22 studies of viral pathogenic mechanisms. Collaborative Cross (CC) mice have proven to be a  
23 valuable system for developing new mouse pathogenesis models for viral infections that are not  
24 well modeled in conventional laboratory mouse lines. To test whether CC mice could provide an  
25 immune-competent model for ZIKV pathogenesis, we infected CC lines with ZIKV and assessed  
26 weight loss, viremia, and production of neutralizing antibodies. We tested 21 CC lines (CC001,

27 CC002, CC003, CC004, CC005, CC006, CC011, CC012, CC013, CC019, CC024, CC028,  
28 CC040, CC041, CC042, CC046, CC051, CC059, CC061, CC068, and CC072, 13 of which have  
29 non-functional alleles of the flavivirus restriction factor Oas1b) and 3 ZIKV strains (MR766,  
30 H/PF/2013, and a mouse-adapted variant of Dakar 41525). ZIKV infection did not induce weight  
31 loss compared to mock-infected controls and accordingly only low levels of viral RNA were  
32 detected in serum. Only a subset of mice developed neutralizing antibodies to ZIKV, likely due to  
33 overall low levels of infection and viremia. Our results are consistent with other studies  
34 demonstrating poor ZIKV infection in interferon-intact mice and suggest that the tested CC lines  
35 do not include polymorphic host genes that greatly increase susceptibility to ZIKV infection.

36

## 37 **Introduction**

38

39 The 2015-2016 emergence of Zika virus (ZIKV) in the Americas, and recognition that ZIKV  
40 infection during pregnancy can result in birth defects, revealed a need for small animal models to  
41 study ZIKV pathogenic mechanisms and evaluate candidate vaccines and antivirals (1). Mice  
42 would be an attractive system for such studies due their low cost and genetic tractability and mice  
43 have proven to be a valuable system for studying other flaviviruses, such as West Nile virus  
44 (WNV). However, studies of ZIKV in mice are confounded because mouse type I interferon (IFN-  
45  $\alpha\beta$ ) signaling restricts ZIKV replication (2), in part due to the inability of ZIKV to antagonize murine  
46 STAT2 and STING (3-6). This results in diminished ZIKV replication in immune competent mice  
47 and has led most groups to use IFN-deficient mouse models including mice lacking the type I  
48 and/or type II IFN receptors (e.g., *Ifnar1*<sup>-/-</sup> or *Ifnar1*<sup>-/-</sup> *Ifngr1*<sup>-/-</sup> double knockout), mice with defects  
49 in IFN induction or signaling (e.g., *Irf3*<sup>-/-</sup> *Irf5*<sup>-/-</sup> *Irf7*<sup>-/-</sup> or *Stat2*<sup>-/-</sup>), or mice treated with IFNAR1-  
50 blocking antibody (7). These models are useful because they allow robust ZIKV replication and  
51 produce severe disease outcomes with high penetrance. However, these models have significant  
52 limitations for studying immune mechanisms that control ZIKV replication and disease. In

53 particular, IFN signaling plays a key role in restricting flavivirus tropism and IFN-deficient mice  
54 typically develop disseminated ZIKV infection that does not recapitulate the tissue tropism  
55 observed in humans. Thus, there is a need for new mouse models that exhibit robust ZIKV  
56 replication and disease within an immune competent host.

57

58 The Collaborative Cross (CC) is a mouse genetic reference population that was developed to  
59 study complex trait genetics and to model genetically complex populations, such as humans (8,  
60 9). CC mice are derived from eight founder lines: five founder lines are classical laboratory lines  
61 with an extensive history of use in mouse genetics, microbial pathogenesis, and disease models  
62 (C57BL/6J, 129S1/SvImJ, A/J, NOD/ShiLtJ, and NZO/HiLtJ). The other three CC founder lines  
63 are wild-derived inbred lines, which represent the three major subspecies of *Mus musculus*:  
64 castaneus (CAST/EiJ), musculus (PWK/PhJ), and domesticus (WSB/EiJ), and introduce much of  
65 the genetic diversity into the CC. These eight founder strains were interbred in a funnel breeding  
66 scheme to produce recombinant mice with genomic contributions from each founder, which were  
67 then bred to homozygosity to produce approximately 80 recombinant inbred CC lines. The CC  
68 mouse genetic reference population is designed to model the genetic diversity present in human  
69 populations and allow the identification and study of polymorphic host genes underlying complex  
70 phenotypes, including the immune response to viral infection. Because each CC line is inbred,  
71 they provide a reproducible system to study diverse phenotypes.

72

73 The genetic architecture of the CC results in a broad spectrum of antiviral responses, including  
74 responses not observed in standard mouse lines that more closely resemble the clinical outcomes  
75 observed in humans (8, 9). This has resulted in the development of mouse models for pathogens,  
76 such as Ebola virus, severe acute respiratory syndrome (SARS) coronavirus, WNV, and  
77 chikungunya virus, that better model clinical aspects of human disease compared to standard  
78 laboratory mouse lines (10-12). Therefore, we sought to use the CC to identify polymorphic host

79 genes that control ZIKV specific innate and adaptive immunity and determine whether variation  
80 in these genes impacts ZIKV susceptibility. These experiments would have the potential to identify  
81 CC lines with enhanced susceptibility to ZIKV replication and disease, thereby resulting in the  
82 development of new mouse models of ZIKV pathogenesis.

83

## 84 **Methods**

85

86 **Mice.** CC mice were obtained from the UNC Systems Genetics Core Facility. All mouse  
87 procedures were performed under protocols approved by the UNC Institutional Animal Care and  
88 Use Committee. 5-week-old male and female mice or 15-21-week-old male mice were inoculated  
89 in a volume of 50 $\mu$ L by a subcutaneous (footpad) route. Mice received  $1 \times 10^3$  FFU of ZIKV strain  
90 H/PF/2013 or MR766 or  $1 \times 10^5$  FFU of strain Dakar-MA; mock-infected mice received diluent  
91 (HBSS with Ca<sup>2+</sup> and Mg<sup>2+</sup> supplement with 1% heat-inactivated fetal bovine serum (FBS)). Mice  
92 were weighed and observed for disease signs daily for 14 days, at which time tissues were  
93 harvested following perfusion with PBS. In separate experiments to evaluate viremia, blood was  
94 collected at 1, 3, and 5 days post-infection (dpi) by submandibular bleed with a 5mm Goldenrod  
95 lancet.

96

97 **Cells and viruses.** Vero (African green monkey kidney epithelial) cells were maintained in  
98 Dulbecco's modified Eagle medium (DMEM) containing 5% heat-inactivated FBS at 37°C with 5%  
99 CO<sub>2</sub>. ZIKV strain H/PF/2013 was provided by the U.S. Centers for Disease Control and  
100 Prevention (13). ZIKV strain MR766 was obtained from the World Reference Center for Emerging  
101 Viruses and Arboviruses; the MR766 variant used in these studies lacks a glycosylation site in  
102 the viral E protein (14-17). ZIKV strain Dakar-MA was generated by serially passaging strain  
103 Dakar 41525 in *Rag1*<sup>-/-</sup> mice to generate a mouse-adapted variant and was provided by Dr.  
104 Michael Diamond (Washington University in St. Louis) (4). Virus stocks were grown in Vero cells

105 and titered by focus-forming assay (FFA) (18). Duplicates of serial 10-fold dilutions of virus in viral  
106 growth medium (DMEM containing 2% FBS and 20 mM HEPES) were applied to Vero cells in 96-  
107 well plates and incubated at 37°C with 5% CO<sub>2</sub> for 1 hr. Cells were then overlaid with 1%  
108 methylcellulose in minimum essential medium Eagle (MEM). Infected cell foci were detected 42-  
109 46 hpi. Following fixation with 2% paraformaldehyde for 1 hr at room temperature, plates were  
110 incubated with 500 ng/ml of flavivirus cross-reactive mouse MAb E60 (19) for 2 hr at room  
111 temperature or overnight at 4°C. After incubation at room temperature for 2 hr with a 1:5,000 dilution  
112 of horseradish peroxidase (HRP)-conjugated goat anti-mouse IgG (Sigma), foci were detected by  
113 addition of TrueBlue substrate (KPL). Foci were quantified with a CTL Immunospot instrument.

114

115 **Measurement of viremia.** Blood was collected in serum separator tubes (BD) and serum was  
116 separated by centrifugation at 8000rpm for 5 min. Serum was stored at -80°C until RNA isolation.  
117 RNA was extracted with the RNeasy Mini Kit (tissues) or Viral RNA Mini Kit (serum) (Qiagen).  
118 ZIKV RNA levels were determined by TaqMan one-step quantitative reverse transcription PCR  
119 (qRT-PCR) on a CFX96 Touch Real-Time PCR Detection System (BioRad) using standard  
120 cycling conditions. Viral burden is expressed on a Log<sub>10</sub> scale as viral RNA equivalents per ml  
121 after comparison with a standard curve produced using serial 10-fold dilutions of RNA extracted  
122 from a ZIKV stock. Primers used to detect ZIKV H/PF/2013 were: forward,  
123 CCGCTGCCCAACACAAG; reverse, CCACTAACGTTCTTTTGCAGACAT; and probe, /56-  
124 FAM/AGCCTACCT/ZEN/TGACAAGCAATCAGACACTCAA/3IABkFQ/ (Integrated DNA  
125 Technologies) (20). Primers used to detect ZIKV Dakar-MA were: forward,  
126 CCACCAATGTTCTCTTGCAGACATATTG; reverse, TTCGGACAGCCGTTGTCCAACACAAG;  
127 and probe: /56-FAM/AGCCTA/ZEN/CCTTGACAAGCAGTC/3IABkFQ (4). Primers and probes  
128 were purchased from Integrated DNA Technologies.

129

130 **Neutralization assay.** Neutralizing antibodies were measured by focus reduction neutralization  
131 test (FRNT). Serial 5-fold dilutions of heat-inactivated serum were added to 50-80 focus forming  
132 units of ZIKV strain H/PF/2013 or MR766 and incubated for 1 hour at 37°C, then titrated by FFA  
133 as above. FRNT50 indicates the serum dilution at which 50% of infectious virus is neutralized.  
134 FRNT50 values were calculated with the sigmoidal dose-response (variable slope) curve in Prism  
135 7 (GraphPad), constraining values between 0 and 100% relative infection. A valid FRNT50 curve  
136 required an  $R^2 > 0.75$ , hill slope absolute value  $> 0.5$ , and had to reach at least 50% relative  
137 infection within the range of the serum dilutions in the assay.

138

139 **Data analysis.** Data were analyzed with GraphPad Prism software. Weights were compared  
140 using two-way ANOVA. For viremia and neutralization analyses, the log-transformed titers were  
141 analyzed by the Mann-Whitney test. A p value of  $< 0.05$  was considered statistically significant.

142

## 143 **Results**

144

145 **Zika virus infection does not induce weight loss in 13 Collaborative Cross lines.** To  
146 determine whether CC mice could provide a superior pathogenesis model, and potentially to  
147 identify polymorphic host genes that contribute to ZIKV pathogenesis, we evaluated ZIKV  
148 infection in 21 CC lines (**Table 1**). Because *Oas1b* is well-known as a dominant restriction factor  
149 of flavivirus infection in mice, both in conventional laboratory mouse lines and in CC lines (12, 21,  
150 22), we focused our study on lines that carry non-functional *Oas1b* alleles, although some lines  
151 with functional *Oas1b* alleles were included for comparison. To determine whether any CC lines  
152 were susceptible to ZIKV disease, we infected 5-week-old mice from 13 CC lines (CC001, CC002,  
153 CC003, CC006, CC011, CC013, CC019, CC024, CC040, CC042, CC051, CC059, and CC061)  
154 with 1000 FFU of ZIKV (or diluent alone) by subcutaneous inoculation in the footpad. We  
155 evaluated 3 ZIKV strains (**Table 2**) with distinct virulence phenotypes in immunodeficient mice.

156 H/PF/2013 (a 2013 human isolate from French Polynesia) causes 100% lethality in *Ifnar1<sup>-/-</sup>* mice  
157 (2, 13). MR766 is the prototype ZIKV strain and has been passaged ~150 times through suckling  
158 mouse brains, which could result in mouse-adaptive mutations (14-16). However, the MR766  
159 variant used in these studies contains a 4 amino acid deletion ablating an N-linked glycosylation  
160 site in the viral envelope protein, resulting in a virus that is less virulent in *Ifnar1<sup>-/-</sup>* mice compared  
161 to H/PF/2013 (2, 17). Dakar-MA was generated by passaging a ZIKV strain isolated from  
162 mosquitos in Senegal in the 1980s (Dakar 41525) serially in *Rag1<sup>-/-</sup>* mice, resulting in a virus with  
163 enhanced pathogenesis in mice (4). Mice were weighed daily after infection, as weight loss is a  
164 sign of ZIKV disease in immunocompromised mouse models and typically precedes lethality (2).  
165 In contrast to IFN-deficient mice (and similar to WT C57Bl/6J mice) (2), none of the CC lines  
166 tested lost weight following infection with any ZIKV strain (**Figure 1**). Indeed, most lines exhibited  
167 modest weight gain over the 14 day experiment, and the rate of weight gain was no slower in  
168 infected mice than in mock-infected controls. None of the mice exhibited disease signs consistent  
169 with those observed in IFN-deficient mice (e.g. hunching, ruffled fur, paralysis, or encephalitis).  
170 CC051 and CC059 share more genetic similarities than average pairs of CC mice, so phenotypes  
171 that differ between these two lines may be especially easy to map by quantitative trait locus (QTL)  
172 analysis. Because 5-week-old CC059 mice exhibited slightly slower weight gain after ZIKV  
173 infection compared to mock-infected mice, whereas ZIKV infection had no effect on the rate of  
174 weight gain in CC051 mice, we tested ZIKV infection in weanlings of these 2 lines. We reasoned  
175 that because 3-week-old mice gain weight at a faster rate than 5-week-old mice, they may reveal  
176 phenotypes that are not evident in 5-week-old mice. However, while we found that 3-week-old  
177 mice indeed gained weight at a faster rate than 5-week-old mice, there was no difference in the  
178 rate of weight gain in mice infected with ZIKV Dakar-MA compared to mock-infected, for either  
179 CC051 or CC059 (**Figure 2**). Altogether, these observations indicate that ZIKV does not induce  
180 significant disease in any of the 13 CC lines tested.

181

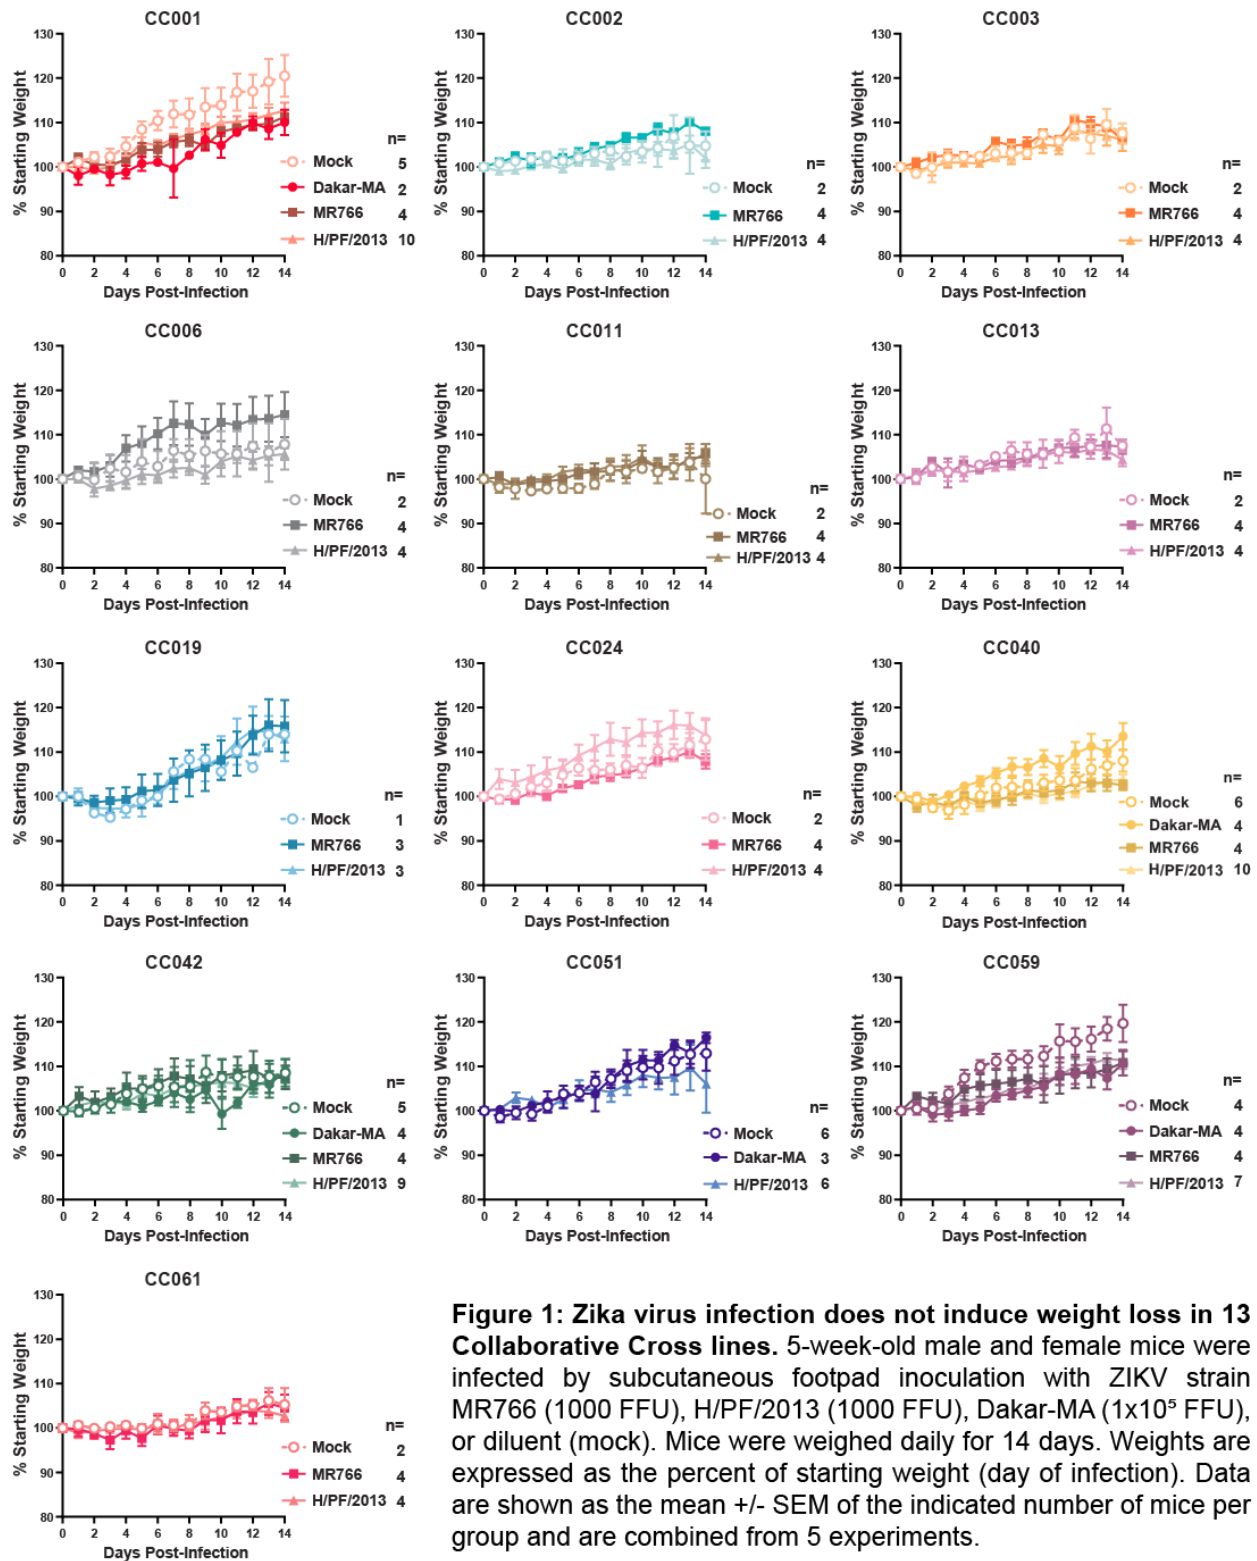

**Figure 1: Zika virus infection does not induce weight loss in 13 Collaborative Cross lines.** 5-week-old male and female mice were infected by subcutaneous footpad inoculation with ZIKV strain MR766 (1000 FFU), H/PF/2013 (1000 FFU), Dakar-MA ( $1 \times 10^5$  FFU), or diluent (mock). Mice were weighed daily for 14 days. Weights are expressed as the percent of starting weight (day of infection). Data are shown as the mean  $\pm$  SEM of the indicated number of mice per group and are combined from 5 experiments.

182

183



184 **Zika virus viremia is rapidly cleared in**  
185 **CC mice.** Although WT C57Bl/6J mice  
186 do not develop disease signs or lose  
187 weight following ZIKV infection, they do  
188 exhibit some low-level viremia which is  
189 rapidly cleared (2). We reasoned that CC  
190 lines that developed elevated or  
191 persistent viremia could provide a useful  
192 experimental system, even if the mice did  
193 not develop overt disease. To test this,  
194 we infected 5-week-old mice from 5 CC lines (CC001, CC040, CC042, CC051, and CC059) with

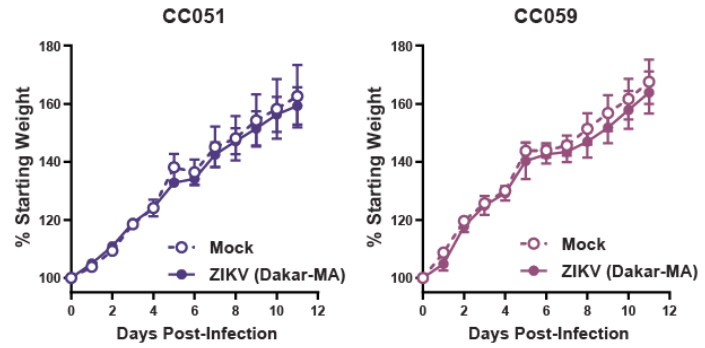

**Figure 2: Zika virus infection does not induce weight loss in weanling CC mice.** 3-week-old male and female CC051 or CC059 mice were infected by subcutaneous footpad inoculation with ZIKV strain Dakar-MA ( $1 \times 10^5$  FFU) or diluent (mock). Mice were weighed daily for 12 days. Weights are expressed as the percent of starting weight (day of infection). Data are shown as the mean  $\pm$  SEM of 7-9 mice (CC051) or 5-6 mice (CC059) per group and are combined from 2 experiments.

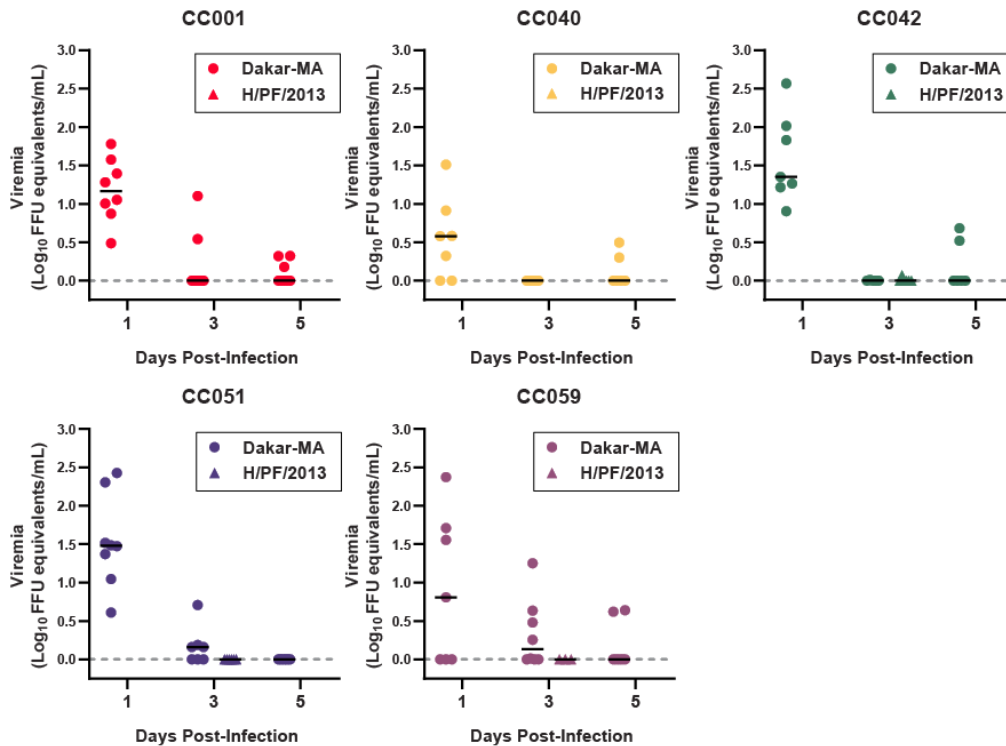

**Figure 3: Zika virus viremia is rapidly cleared in young CC mice.** 5 week-old male and female mice of the indicated CC lines were infected by subcutaneous footpad inoculation with ZIKV strain Dakar-MA ( $1 \times 10^5$  FFU) or H/PF/2013 (1000 FFU). Blood was sampled at 1, 3, and 5 days post-infection and viral RNA in serum was measured by qRT-PCR. Dotted line indicates limit of detection. Each data point corresponds to one mouse and data are combined from 3 experiments; bar indicates median.

195

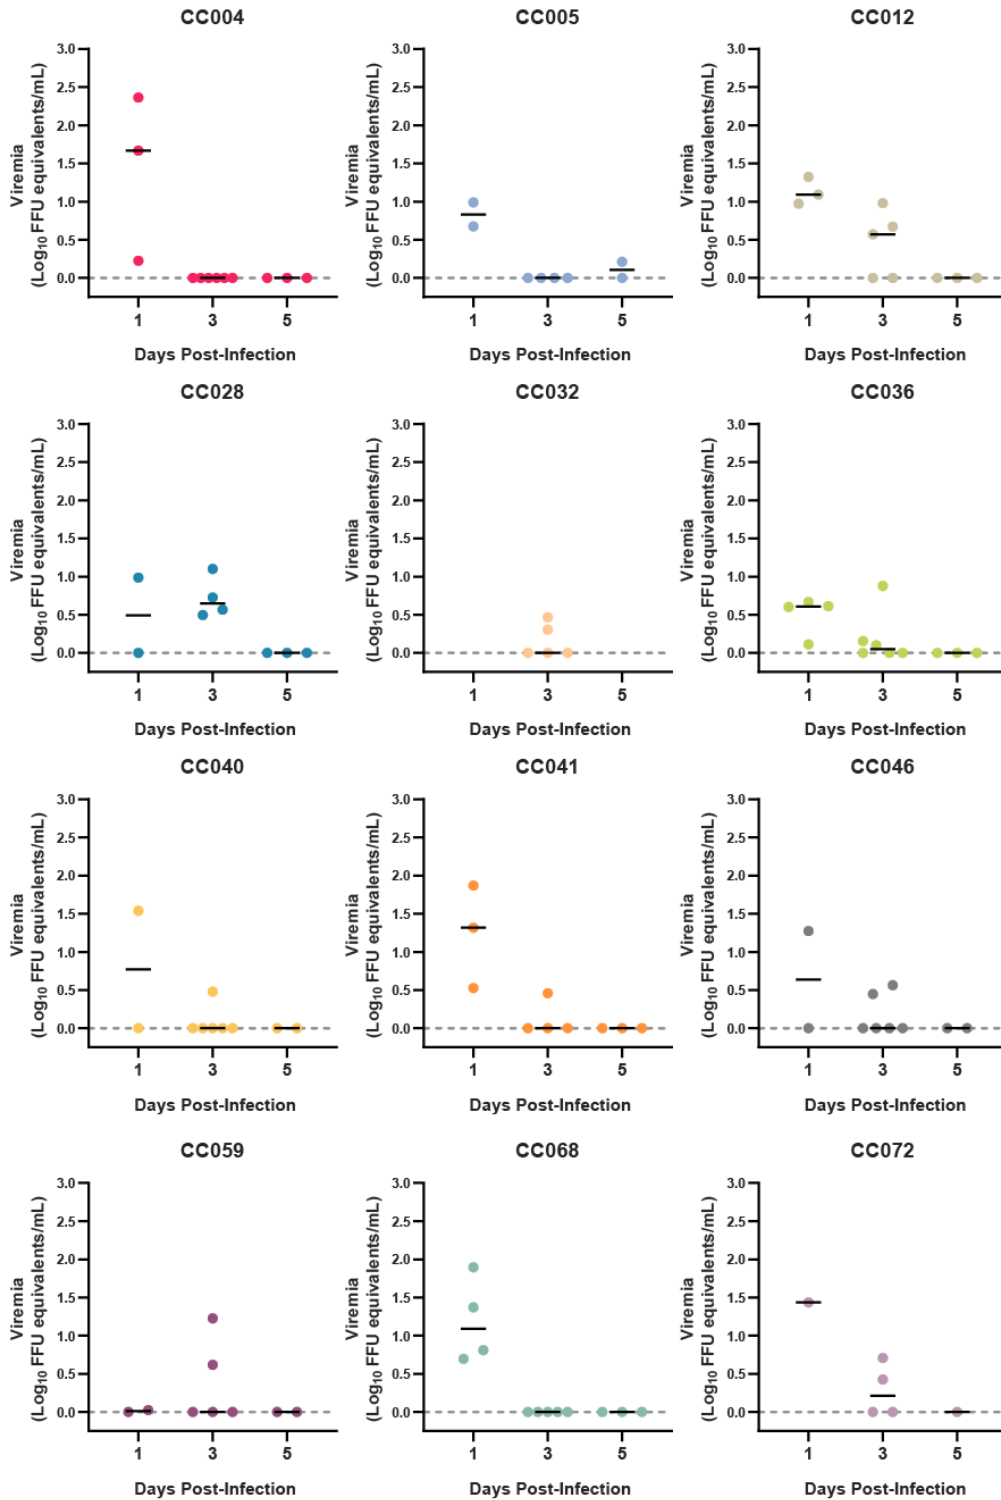

**Figure 4: Zika virus viremia is rapidly cleared in adult CC mice.** 15-21 week-old male mice of the indicated CC lines were infected by subcutaneous footpad inoculation with ZIKV strain Dakar-MA ( $1 \times 10^5$  FFU). Blood was sampled at 1, 3, and 5 days post-infection and viral RNA in serum was measured by qRT-PCR. Dotted line indicates limit of detection. Each data point corresponds to one mouse and data are combined from 5 experiments; bar indicates median.

196 ZIKV Dakar-MA or H/PF/2013 and measured viral RNA in serum at 1, 3, and 5 days dpi by qRT-  
197 PCR. After ZIKV Dakar-MA infection, low-level viremia (approximately 10 FFU equivalents of viral  
198 RNA per mL of serum) was detected at 1 dpi but it was greatly diminished by 3dpi (**Figure 3**). All  
199 CC001, CC042, and CC051 mice exhibited detectable viremia at 1dpi, whereas viremia was  
200 detected in only a subset of CC040 and CC059 mice. No viral RNA was detected in mice infected  
201 with ZIKV H/PF/2013, though viremia was evaluated only at 3 dpi and only in CC042, CC051, and  
202 CC059 mice. We next evaluated ZIKV viremia in adult CC mice (15-21 weeks old) infected with  
203 ZIKV Dakar-MA. Similar to 5-week-old mice, adult mice exhibited approximately 10 FFU  
204 equivalents of viral RNA per mL of serum at 1dpi, which diminished by 3dpi and was undetectable  
205 by 5dpi (**Figure 4**). Altogether, these results show that while some ZIKV replication does occur in  
206 CC mice, the virus is cleared rapidly, consistent with the lack of disease signs observed in CC  
207 mice. Importantly, we did not observe robust differences in viremia between CC lines, indicating  
208 that this is not a suitable phenotype for QTL mapping studies.

209

210 **Zika virus infection induces neutralizing antibodies in Collaborative Cross mice.** Since  
211 ZIKV produced only transient low-level viremia in CC mice, we tested whether this was sufficient  
212 to elicit the production of neutralizing antibodies. We collected serum at 14dpi from 5 CC lines

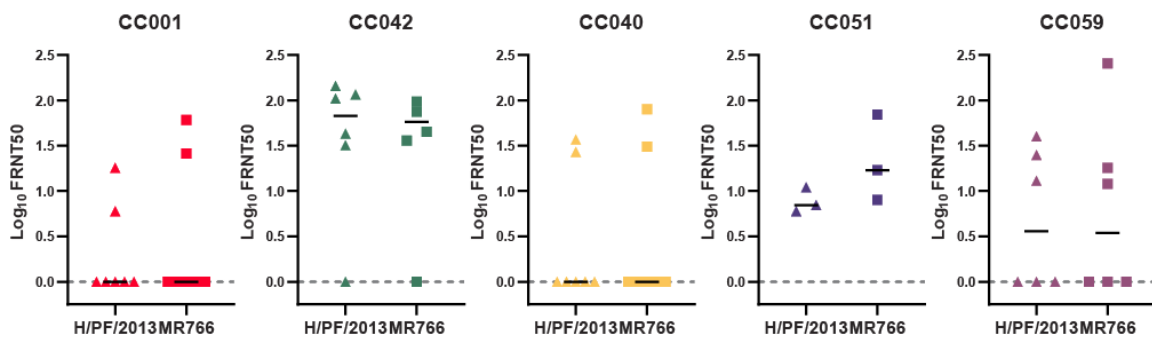

**Figure 5: Zika virus infection induces neutralizing antibodies in Collaborative Cross mice.** 5-week-old male and female mice were infected by subcutaneous footpad inoculation with ZIKV strain H/PF/2013 (1000 FFU) and serum was collected at 14 days post-infection. Heat-inactivated serum was tested for neutralizing activity against ZIKV strains H/PF/2013 and MR766 by focus-reduction neutralization test on Vero cells. FRNT50 values indicate the serum dilution at which infection was inhibited by 50%. Dotted line indicates limit of detection. Each data point corresponds to one mouse; bar indicates median,

213 (CC001, CC040, CC042, CC051, CC059) infected with ZIKV H/PF/2013 at 5 weeks of age. Heat-  
214 inactivated serum was tested for neutralizing activity against ZIKV H/PF/2013 and MR766 (**Figure**  
215 **5**). Consistent with low-level viremia, neutralizing antibody titers were low (median FRNT50 titers  
216 <10), with the exception of CC042 which exhibited FRNT50 titers of ~100. CC042, CC001, and  
217 CC051 exhibited similar viral loads at 1dpi, indicating that viremia is not the sole determinant of  
218 neutralizing antibody responses. Consistent with our prior studies of human antibody responses  
219 to ZIKV (23), MR766 was more readily neutralized (higher FRNT50) than H/PF/2013.

220

221 Taken together, our results are consistent with other studies demonstrating poor ZIKV infection  
222 in IFN-intact mice and suggest that the tested CC lines do not include polymorphic host genes  
223 that greatly increase susceptibility to ZIKV infection.

224

## 225 **Discussion**

226

227 Prior to the emergence of ZIKV in Latin America, few studies had evaluated ZIKV pathogenesis  
228 in animals (24-26). However, the explosive growth of ZIKV research since 2015 has spurred the  
229 development of new animal models, revealing pathogenic mechanisms and providing systems for  
230 evaluating therapeutic interventions. The most significant models of ZIKV infection are non-  
231 human primates and mice (7), but ZIKV disease also has been studied in guinea pigs, hamsters,  
232 tree shrews, and swine (27-35). Mice offer significant advantages in terms of cost, scale, speed,  
233 and genetic tractability, enabling mechanistic studies that are not feasible in non-human primate  
234 models. A significant disadvantage of mouse models is that ZIKV replicates poorly in  
235 immunocompetent mice and thus does not exhibit the tissue tropism and disease phenotypes  
236 characteristic of human infection. Mice lacking type I IFN production or responses succumb to  
237 ZIKV infection and exhibit broad tissue tropism, implying that the innate antiviral response is a  
238 key barrier to ZIKV replication and pathogenesis in mice (2, 36). Mice lacking the IFN- $\alpha\beta$  receptor

239 (alone, or also lacking the IFN- $\gamma$  receptor) have provided useful models for studying ZIKV disease  
240 phenotypes including congenital infection, sexual transmission, and ocular infection, as well as  
241 for evaluating candidate vaccines and antivirals (37-43). The restriction of ZIKV replication in mice  
242 results in part from an inability of ZIKV NS5 to degrade murine STAT2 and therefore ZIKV cannot  
243 inhibit IFN signaling in mice by the same mechanism used in human cells (5, 6). However, NS5-  
244 mediated antagonism restricts antiviral signaling only in infected cells whereas these responses  
245 are sustained in uninfected cells responding to paracrine IFN signaling. Thus, *Stat2*<sup>-/-</sup> mice  
246 succumb to ZIKV infection, but transgenic mice expressing human STAT2 only exhibit disease in  
247 the context of ZIKV strains with additional mouse-adaptive mutations (4, 44). In addition, the ZIKV  
248 NS2B-NS3 protease targets human but not murine STING, resulting in sustained IFN production  
249 and diminished viral replication in mouse cells (3). However, mice lacking STING were not more  
250 susceptible to ZIKV than wild-type mice (2, 3), implying that STING is a contributing but not  
251 dominant factor restricting ZIKV infection in mice.

252

253 Flavivirus resistance is one of the earliest examples of a genetic determinant of pathogen  
254 susceptibility defined in mice. Over 80 years ago, flavivirus resistance was shown to be inherited  
255 in a single gene autosomal dominant manner (22, 45, 46), and more than 15 years ago the  
256 resistance phenotype was mapped to the *Oas1b* gene (47, 48). More recent studies used F1  
257 hybrids of CC mice to define genetic determinants of WNV pathogenesis and found that the QTL  
258 with the largest effect mapped to *Oas1b* (12, 49). The antiviral activity of *Oas1b* restricts all  
259 flaviviruses (>13 viruses tested) and appears to act exclusively against flaviviruses. Other  
260 members of the *Oas* gene family restrict viral replication by sensing dsRNA and synthesizing the  
261 second messenger 2'-5' oligoadenylate, which activates the cytoplasmic RNA degrading enzyme  
262 RNaseL. However, *Oas1b* is not catalytically active and does not activate RNaseL (50). The  
263 flavivirus restricting activity of *Oas1b* is cell intrinsic and restricts viral replication in a post-entry  
264 manner, but its mechanism is unknown (50, 51). OAS orthologs in other species also restrict viral

265 replication (52, 53), and *OAS1* polymorphisms are associated with WNV disease in humans (54,  
266 55) and horses (56). However, humans do not have a functional equivalent of murine *Oas1b* with  
267 RNaseL-independent inhibitory activity. Thus, identifying non-*Oas1b* host factors that modulate  
268 flavivirus susceptibility in mice may provide insight into mechanisms that control flavivirus disease  
269 in humans.

270

271 There is a need for improved mouse models of ZIKV infection to advance studies of ZIKV  
272 pathogenic mechanisms and to evaluate candidate vaccines and therapeutics. Current ZIKV  
273 mouse models typically rely on mice that lack type I IFN signaling which limits their utility for  
274 studying immune mechanisms that control ZIKV replication and disease. In particular, IFN  
275 signaling plays a key role in restricting flavivirus tropism and IFN-deficient mice typically develop  
276 disseminated ZIKV infection that does not recapitulate the tissue tropism observed in humans.  
277 CC mice have provided useful experimental systems for other pathogenic viruses whose disease  
278 phenotypes are not well-modeled in conventional laboratory mouse lines, including Ebola virus,  
279 SARS coronavirus, and chikungunya virus (10, 11), because they exhibit unique phenotypes that  
280 are not necessarily predicted from the 8 founder lines. Thus, we sought to determine whether CC  
281 mice might provide a useful model system for ZIKV. We found that, although ZIKV viremia was  
282 detectable at 1dpi, the amount of viral RNA detected in serum was very low and cleared rapidly,  
283 and infected mice exhibited no signs of disease including weight loss. Based on these results, the  
284 tested CC lines are unlikely to be useful as models of ZIKV disease or as tools to map host factors  
285 that control ZIKV pathogenesis. This was true even of CC lines carrying non-functional alleles of  
286 *Oas1b*, which would be expected to be the most susceptible to flavivirus infection (12).

287

288 It is possible that additional approaches could reveal experimentally useful ZIKV phenotypes in  
289 CC mice. These could include administering virus by an intravenous, rather than subcutaneous  
290 route, or infecting with a higher dose of virus, although the  $1 \times 10^5$  FFU dose we used for infections

291 with ZIKV Dakar-MA is quite high. Another approach would be administering an IFNAR-blocking  
292 monoclonal antibody (MAR1-5A3) prior to ZIKV infection. In C57Bl/6J mice, MAR1-5A3 treatment  
293 results in elevated viremia and relevant clinical phenotypes such as transplacental transmission,  
294 though it is not sufficient to produce weight loss or lethality. Furthermore, our study tested only a  
295 subset of CC lines; additional lines not tested here may reveal more robust pathogenesis  
296 phenotypes. The overall lack of disease in CC mice highlights the species-specific restriction  
297 factors that limit ZIKV infection in mice. CC mice remain a valuable system for studying host  
298 factors that control flavivirus pathogenesis, but are likely to be more revealing for flaviviruses that  
299 are able to cause more robust infection in mice than ZIKV.

300

### 301 **Acknowledgements**

302

303 This work was supported by U19-AI100625-04S1 (M.T.H. and R.S.B.), a Pilot Project from the  
304 UNC Systems Genomics program (H.M.L.), and startup funds from UNC Department of  
305 Microbiology and Immunology and the Lineberger Comprehensive Cancer Center (H.M.L.)

306

307

308 **Table 1: Collaborative Cross mouse lines used in this study**

| CC Line | Oas1b allele | ZIKV strains tested            | Mouse ages tested    | Data collected                        |
|---------|--------------|--------------------------------|----------------------|---------------------------------------|
| CC001   | Null         | MR766<br>H/PF/2013<br>Dakar-MA | 5wk                  | Weight<br>Viremia<br>Neutralizing Abs |
| CC002   | Null         | MR766<br>H/PF/2013             | 5wk                  | Weight                                |
| CC003   | WSB          | MR766<br>H/PF/2013             | 5wk                  | Weight                                |
| CC004   | PWK          | Dakar-MA                       | 15-21wk              | Viremia                               |
| CC005   | Null         | Dakar-MA                       | 15-21wk              | Viremia                               |
| CC006   | Null         | MR766<br>H/PF/2013             | 5wk                  | Weight                                |
| CC011   | Null         | MR766<br>H/PF/2013             | 5wk                  | Weight                                |
| CC012   | WSB          | Dakar-MA                       | 15-21wk              | Viremia                               |
| CC013   | Null         | MR766<br>H/PF/2013             | 5wk                  | Weight                                |
| CC019   | WSB          | MR766<br>H/PF/2013             | 5wk                  | Weight                                |
| CC024   | Null         | MR766<br>H/PF/2013             | 5wk                  | Weight                                |
| CC028   | PWK          | Dakar-MA                       | 15-21wk              | Viremia                               |
| CC040   | Null         | MR766<br>H/PF/2013<br>Dakar-MA | 5wk                  | Weight<br>Neutralizing Abs            |
| CC041   | CAST         | Dakar-MA                       | 15-21wk              | Viremia                               |
| CC042   | WSB          | MR766<br>H/PF/2013<br>Dakar-MA | 5wk                  | Weight<br>Neutralizing Abs            |
| CC046   | CAST         | Dakar-MA                       | 15-21wk              | Viremia                               |
| CC051   | Null         | H/PF/2013<br>Dakar-MA          | 3wk, 5wk             | Weight<br>Viremia<br>Neutralizing Abs |
| CC059   | Null         | MR766<br>H/PF/2013<br>Dakar-MA | 3wk, 5wk,<br>15-21wk | Weight<br>Viremia<br>Neutralizing Abs |
| CC061   | Null         | MR766<br>H/PF/2013             | 5wk                  | Weight                                |
| CC068   | Null         | Dakar-MA                       | 15-21wk              | Viremia                               |
| CC072   | Null         | Dakar-MA                       | 15-21wk              | Viremia                               |

309

310



311 **Table 2: Zika virus strains used in this study**

| Strain    | Origin                                                      | qRT-PCR Primers                                                                                                          | Ref               |
|-----------|-------------------------------------------------------------|--------------------------------------------------------------------------------------------------------------------------|-------------------|
| MR766     | Uganda<br>1947<br>Sentinel rhesus<br>macaque                | Fwd: GGGCGTGCATATTCCTTGT<br>Rev: TCCATCTGTCCCTGCATACT<br>Probe: 56FAM/TTCACATTC/ZEN/ACCAAGGTCCCAGCT/3IABkFQ              | (2,<br>14-<br>17) |
| H/PF/2013 | French<br>Polynesia<br>2013<br>Human patient                | Fwd: TTGGTCATGATACTGCTGATTGC<br>Rev: CCTTCCACAAAGTCCCTATTGC<br>Probe:<br>56FAM/CGGCATACA/ZEN/GCATCAGGTGCATAGGAG/3IABkFQ  | (2,<br>13,<br>17) |
| Dakar-MA  | Mouse-adapted<br>Dakar 41519<br>Senegal<br>1984<br>Mosquito | Fwd: CCACCAATGTTCTCTTGCAGACATATTG<br>Rev: TTCGGACAGCCGTTGTCCAACACAAG<br>Probe: 56FAM/AGCCTACCT/ZIEN/TGACAAGCAGTC/3IABkFQ | (4)               |

312

313 **References**

314

- 315 1. **Pierson TC, Diamond MS.** 2018. The emergence of Zika virus and its new clinical  
316 syndromes. *Nature* **560**:573-581.
- 317 2. **Lazear HM, Govero J, Smith AM, Platt DJ, Fernandez E, Miner JJ, Diamond MS.** 2016.  
318 A Mouse Model of Zika Virus Pathogenesis. *Cell Host Microbe* **19**:720-730.
- 319 3. **Ding Q, Gaska JM, Douam F, Wei L, Kim D, Balev M, Heller B, Ploss A.** 2018. Species-  
320 specific disruption of STING-dependent antiviral cellular defenses by the Zika virus NS2B3  
321 protease. *Proc Natl Acad Sci U S A* **115**:E6310-E6318.
- 322 4. **Gorman MJ, Caine EA, Zaitsev K, Begley MC, Weger-Lucarelli J, Uccellini MB,**  
323 **Tripathi S, Morrison J, Yount BL, Dinnon KH, 3rd, Ruckert C, Young MC, Zhu Z,**  
324 **Robertson SJ, McNally KL, Ye J, Cao B, Mysorekar IU, Ebel GD, Baric RS, Best SM,**  
325 **Artyomov MN, Garcia-Sastre A, Diamond MS.** 2018. An Immunocompetent Mouse  
326 Model of Zika Virus Infection. *Cell Host Microbe* **23**:672-685 e676.
- 327 5. **Grant A, Ponia SS, Tripathi S, Balasubramaniam V, Miorin L, Sourisseau M, Schwarz**  
328 **MC, Sanchez-Seco MP, Evans MJ, Best SM, Garcia-Sastre A.** 2016. Zika Virus Targets  
329 Human STAT2 to Inhibit Type I Interferon Signaling. *Cell Host Microbe* **19**:882-890.
- 330 6. **Kumar A, Hou S, Airo AM, Limonta D, Mancinelli V, Branton W, Power C, Hobman**  
331 **TC.** 2016. Zika virus inhibits type-I interferon production and downstream signaling. *EMBO*  
332 *Rep* **17**:1766-1775.
- 333 7. **Morrison TE, Diamond MS.** 2017. Animal Models of Zika Virus Infection, Pathogenesis,  
334 and Immunity. *J Virol* **91**.
- 335 8. **Noll KE, Ferris MT, Heise MT.** 2019. The Collaborative Cross: A Systems Genetics  
336 Resource for Studying Host-Pathogen Interactions. *Cell Host Microbe* **25**:484-498.
- 337 9. **Leist SR, Baric RS.** 2018. Giving the Genes a Shuffle: Using Natural Variation to  
338 Understand Host Genetic Contributions to Viral Infections. *Trends Genet*  
339 doi:10.1016/j.tig.2018.07.005.
- 340 10. **Gralinski LE, Ferris MT, Aylor DL, Whitmore AC, Green R, Frieman MB, Deming D,**  
341 **Menachery VD, Miller DR, Buus RJ, Bell TA, Churchill GA, Threadgill DW, Katze MG,**  
342 **McMillan L, Valdar W, Heise MT, Pardo-Manuel de Villena F, Baric RS.** 2015. Genome

- 343 Wide Identification of SARS-CoV Susceptibility Loci Using the Collaborative Cross. *PLoS*  
344 *Genet* **11**:e1005504.
- 345 11. **Rasmussen AL, Okumura A, Ferris MT, Green R, Feldmann F, Kelly SM, Scott DP,**  
346 **Safronetz D, Haddock E, LaCasse R, Thomas MJ, Sova P, Carter VS, Weiss JM,**  
347 **Miller DR, Shaw GD, Korh MJ, Heise MT, Baric RS, de Villena FP, Feldmann H, Katze**  
348 **MG.** 2014. Host genetic diversity enables Ebola hemorrhagic fever pathogenesis and  
349 resistance. *Science* **346**:987-991.
- 350 12. **Graham JB, Thomas S, Swarts J, McMillan AA, Ferris MT, Suthar MS, Treuting PM,**  
351 **Iretton R, Gale M, Jr., Lund JM.** 2015. Genetic diversity in the collaborative cross model  
352 recapitulates human West Nile virus disease outcomes. *MBio* **6**:e00493-00415.
- 353 13. **Baronti C, Piorkowski G, Charrel RN, Boubis L, Leparac-Goffart I, de Lamballerie X.**  
354 2014. Complete coding sequence of zika virus from a French polynesia outbreak in 2013.  
355 *Genome Announc* **2**.
- 356 14. **Dick GW, Kitchen SF, Haddock AJ.** 1952. Zika virus. I. Isolations and serological  
357 specificity. *Trans R Soc Trop Med Hyg* **46**:509-520.
- 358 15. **Ladner JT, Wiley MR, Prieto K, Yasuda CY, Nagle E, Kasper MR, Reyes D, Vasilakis**  
359 **N, Heang V, Weaver SC, Haddock A, Tesh RB, Sovann L, Palacios G.** 2016. Complete  
360 Genome Sequences of Five Zika Virus Isolates. *Genome Announc* **4**.
- 361 16. **Yun SI, Song BH, Frank JC, Julander JG, Polejaeva IA, Davies CJ, White KL, Lee**  
362 **YM.** 2016. Complete Genome Sequences of Three Historically Important,  
363 Spatiotemporally Distinct, and Genetically Divergent Strains of Zika Virus: MR-766, P6-  
364 740, and PRVABC-59. *Genome Announc* **4**.
- 365 17. **Carbaugh DL, Baric RS, Lazear HM.** 2019. Envelope protein glycosylation mediates Zika  
366 virus pathogenesis. *J Virol* doi:10.1128/JVI.00113-19.
- 367 18. **Brien JD, Lazear HM, Diamond MS.** 2013. Propagation, quantification, detection, and  
368 storage of West Nile virus. *Curr Protoc Microbiol* **31**:15D 13 11-15D 13 18.
- 369 19. **Oliphant T, Nybakken GE, Engle M, Xu Q, Nelson CA, Sukupolvi-Petty S, Marri A,**  
370 **Lachmi BE, Olshevsky U, Fremont DH, Pierson TC, Diamond MS.** 2006. Antibody  
371 recognition and neutralization determinants on domains I and II of West Nile Virus  
372 envelope protein. *J Virol* **80**:12149-12159.
- 373 20. **Lanciotti RS, Kosoy OL, Laven JJ, Velez JO, Lambert AJ, Johnson AJ, Stanfield SM,**  
374 **Duffy MR.** 2008. Genetic and serologic properties of Zika virus associated with an  
375 epidemic, Yap State, Micronesia, 2007. *Emerg Infect Dis* **14**:1232-1239.
- 376 21. **Scherbik SV, Kluetzman K, Perelygin AA, Brinton MA.** 2007. Knock-in of the Oas1b(r)  
377 allele into a flavivirus-induced disease susceptible mouse generates the resistant  
378 phenotype. *Virology* **368**:232-237.
- 379 22. **Brinton MA, Perelygin AA.** 2003. Genetic resistance to flaviviruses. *Adv Virus Res*  
380 **60**:43-85.
- 381 23. **Collins MH, McGowan E, Jadi R, Young E, Lopez CA, Baric RS, Lazear HM, de Silva**  
382 **AM.** 2017. Lack of Durable Cross-Neutralizing Antibodies Against Zika Virus from Dengue  
383 Virus Infection. *Emerg Infect Dis* **23**:773-781.
- 384 24. **Dick GW.** 1952. Zika virus. II. Pathogenicity and physical properties. *Trans R Soc Trop*  
385 *Med Hyg* **46**:521-534.
- 386 25. **Bell TM, Field EJ, Narang HK.** 1971. Zika virus infection of the central nervous system  
387 of mice. *Arch Gesamte Virusforsch* **35**:183-193.
- 388 26. **Way JH, Bowen ET, Platt GS.** 1976. Comparative studies of some African arboviruses in  
389 cell culture and in mice. *J Gen Virol* **30**:123-130.
- 390 27. **Deng YQ, Zhang NN, Li XF, Wang YQ, Tian M, Qiu YF, Fan JW, Hao JN, Huang XY,**  
391 **Dong HL, Fan H, Wang YG, Zhang FC, Tong YG, Xu Z, Qin CF.** 2017. Intranasal  
392 infection and contact transmission of Zika virus in guinea pigs. *Nat Commun* **8**:1648.

- 393 28. **Wichgers Schreur PJ, van Keulen L, Anjema D, Kant J, Kortekaas J.** 2018.  
394 Microencephaly in fetal piglets following in utero inoculation of Zika virus. *Emerg Microbes*  
395 *Infect* **7**:42.
- 396 29. **Darbella J, Cox B, Lai K, Delgado-Ortega M, Wheler C, Wilson D, Walker S, Starrak**  
397 **G, Hockley D, Huang Y, Mutwiri G, Potter A, Gilmour M, Safronetz D, Gerdt V,**  
398 **Karniychuk U.** 2017. Zika Virus Causes Persistent Infection in Porcine Conceptuses and  
399 may Impair Health in Offspring. *EBioMedicine* **25**:73-86.
- 400 30. **Darbella J, Lai K, Babiuk S, Berhane Y, Ambagala A, Wheler C, Wilson D, Walker**  
401 **S, Potter A, Gilmour M, Safronetz D, Gerdt V, Karniychuk U.** 2017. Neonatal pigs are  
402 susceptible to experimental Zika virus infection. *Emerg Microbes Infect* **6**:e6.
- 403 31. **Miller LJ, Nasar F, Schellhase CW, Norris SL, Kimmel AE, Valdez SM, Wollen-**  
404 **Roberts SE, Shamblin JD, Sprague TR, Lugo-Roman LA, Jarman RG, Yoon IK, Alera**  
405 **MT, Bavari S, Pitt MLM, Haddow AD.** 2018. Zika Virus Infection in Syrian Golden  
406 Hamsters and Strain 13 Guinea Pigs. *Am J Trop Med Hyg* **98**:864-867.
- 407 32. **Bierle CJ, Fernandez-Alarcon C, Hernandez-Alvarado N, Zabeli JC, Janus BC, Putri**  
408 **DS, Schleiss MR.** 2017. Assessing Zika virus replication and the development of Zika-  
409 specific antibodies after a mid-gestation viral challenge in guinea pigs. *PLoS One*  
410 **12**:e0187720.
- 411 33. **Kumar M, Krause KK, Azouz F, Nakano E, Nerurkar VR.** 2017. A guinea pig model of  
412 Zika virus infection. *Virology* **14**:75.
- 413 34. **Siddharthan V, Van Wettere AJ, Li R, Miao J, Wang Z, Morrey JD, Julander JG.** 2017.  
414 Zika virus infection of adult and fetal STAT2 knock-out hamsters. *Virology* **507**:89-95.
- 415 35. **Zhang NN, Zhang L, Deng YQ, Feng Y, Ma F, Wang Q, Ye Q, Han Y, Sun X, Zhang**  
416 **FC, Qi X, Wang G, Dai J, Xia X, Qin CF.** 2019. Zika virus infection in *Tupaia belangeri*  
417 causes dermatological manifestations and confers protection against secondary infection.  
418 *J Virol* doi:10.1128/JVI.01982-18.
- 419 36. **Rossi SL, Tesh RB, Azar SR, Muruato AE, Hanley KA, Auguste AJ, Langsjoen RM,**  
420 **Paessler S, Vasilakis N, Weaver SC.** 2016. Characterization of a Novel Murine Model to  
421 Study Zika Virus. *Am J Trop Med Hyg* **94**:1362-1369.
- 422 37. **Miner JJ, Sene A, Richner JM, Smith AM, Santeford A, Ban N, Weger-Lucarelli J,**  
423 **Manzella F, Ruckert C, Govero J, Noguchi KK, Ebel GD, Diamond MS, Apte RS.** 2016.  
424 Zika Virus Infection in Mice Causes Panuveitis with Shedding of Virus in Tears. *Cell Rep*  
425 **16**:3208-3218.
- 426 38. **McDonald EM, Duggal NK, Ritter JM, Brault AC.** 2018. Infection of epididymal epithelial  
427 cells and leukocytes drives seminal shedding of Zika virus in a mouse model. *PLoS Negl*  
428 *Trop Dis* **12**:e0006691.
- 429 39. **Duggal NK, Ritter JM, Pectorius SE, Zaki SR, Davis BS, Chang GJ, Bowen RA, Brault**  
430 **AC.** 2017. Frequent Zika Virus Sexual Transmission and Prolonged Viral RNA Shedding  
431 in an Immunodeficient Mouse Model. *Cell Rep* **18**:1751-1760.
- 432 40. **Richner JM, Himansu S, Dowd KA, Butler SL, Salazar V, Fox JM, Julander JG, Tang**  
433 **WW, Shresta S, Pierson TC, Ciaramella G, Diamond MS.** 2017. Modified mRNA  
434 Vaccines Protect against Zika Virus Infection. *Cell* **169**:176.
- 435 41. **Govero J, Esakky P, Scheaffer SM, Fernandez E, Drury A, Platt DJ, Gorman MJ,**  
436 **Richner JM, Caine EA, Salazar V, Moley KH, Diamond MS.** 2016. Zika virus infection  
437 damages the testes in mice. *Nature* **540**:438-442.
- 438 42. **Zhao H, Fernandez E, Dowd KA, Speer SD, Platt DJ, Gorman MJ, Govero J, Nelson**  
439 **CA, Pierson TC, Diamond MS, Fremont DH.** 2016. Structural Basis of Zika Virus-  
440 Specific Antibody Protection. *Cell* **166**:1016-1027.
- 441 43. **Tang WW, Young MP, Mamidi A, Regla-Nava JA, Kim K, Shresta S.** 2016. A Mouse  
442 Model of Zika Virus Sexual Transmission and Vaginal Viral Replication. *Cell Rep* **17**:3091-  
443 3098.

- 444 44. **Tripathi S, Balasubramaniam VR, Brown JA, Mena I, Grant A, Bardina SV, Maringer**  
445 **K, Schwarz MC, Maestre AM, Sourisseau M, Albrecht RA, Krammer F, Evans MJ,**  
446 **Fernandez-Sesma A, Lim JK, Garcia-Sastre A.** 2017. A novel Zika virus mouse model  
447 reveals strain specific differences in virus pathogenesis and host inflammatory immune  
448 responses. *PLoS Pathog* **13**:e1006258.
- 449 45. **Webster LT.** 1937. Inheritance of Resistance of Mice to Enteric Bacterial and Neurotropic  
450 Virus Infections. *J Exp Med* **65**:261-286.
- 451 46. **Webster LT, Clow AD.** 1936. Experimental Encephalitis (St. Louis Type) in Mice with  
452 High Inborn Resistance : A Chronic Subclinical Infection. *J Exp Med* **63**:827-845.
- 453 47. **Perelygin AA, Scherbik SV, Zhulin IB, Stockman BM, Li Y, Brinton MA.** 2002.  
454 Positional cloning of the murine flavivirus resistance gene. *Proc Natl Acad Sci U S A*  
455 **99**:9322-9327.
- 456 48. **Mashimo T, Lucas M, Simon-Chazottes D, Frenkiel MP, Montagutelli X, Ceccaldi PE,**  
457 **Deubel V, Guenet JL, Despres P.** 2002. A nonsense mutation in the gene encoding 2'-  
458 5'-oligoadenylate synthetase/L1 isoform is associated with West Nile virus susceptibility  
459 in laboratory mice. *Proc Natl Acad Sci U S A* **99**:11311-11316.
- 460 49. **Green R, Wilkins C, Thomas S, Sekine A, Hendrick DM, Voss K, Ireton RC, Mooney**  
461 **M, Go JT, Choonoo G, Jeng S, de Villena FP, Ferris MT, McWeeney S, Gale M, Jr.**  
462 2017. Oas1b-dependent Immune Transcriptional Profiles of West Nile Virus Infection in  
463 the Collaborative Cross. *G3 (Bethesda)* **7**:1665-1682.
- 464 50. **Elbahesh H, Jha BK, Silverman RH, Scherbik SV, Brinton MA.** 2011. The Flvr-encoded  
465 murine oligoadenylate synthetase 1b (Oas1b) suppresses 2-5A synthesis in intact cells.  
466 *Virology* **409**:262-270.
- 467 51. **Courtney SC, Di H, Stockman BM, Liu H, Scherbik SV, Brinton MA.** 2012. Identification  
468 of novel host cell binding partners of Oas1b, the protein conferring resistance to flavivirus-  
469 induced disease in mice. *J Virol* **86**:7953-7963.
- 470 52. **Li Y, Banerjee S, Wang Y, Goldstein SA, Dong B, Gaughan C, Silverman RH, Weiss**  
471 **SR.** 2016. Activation of RNase L is dependent on OAS3 expression during infection with  
472 diverse human viruses. *Proc Natl Acad Sci U S A* **113**:2241-2246.
- 473 53. **Perelygin AA, Zharkikh AA, Scherbik SV, Brinton MA.** 2006. The mammalian 2'-5'  
474 oligoadenylate synthetase gene family: evidence for concerted evolution of paralogous  
475 Oas1 genes in Rodentia and Artiodactyla. *J Mol Evol* **63**:562-576.
- 476 54. **Lim JK, Lisco A, McDermott DH, Huynh L, Ward JM, Johnson B, Johnson H, Pape**  
477 **J, Foster GA, Krysztof D, Follmann D, Stramer SL, Margolis LB, Murphy PM.** 2009.  
478 Genetic variation in OAS1 is a risk factor for initial infection with West Nile virus in man.  
479 *PLoS Pathog* **5**:e1000321.
- 480 55. **Bigham AW, Buckingham KJ, Husain S, Emond MJ, Bofferding KM, Gildersleeve H,**  
481 **Rutherford A, Astakhova NM, Perelygin AA, Busch MP, Murray KO, Sejvar JJ, Green**  
482 **S, Kriesel J, Brinton MA, Bamshad M.** 2011. Host genetic risk factors for West Nile virus  
483 infection and disease progression. *PLoS One* **6**:e24745.
- 484 56. **Rios JJ, Fleming JG, Bryant UK, Carter CN, Huber JC, Long MT, Spencer TE,**  
485 **Adelson DL.** 2010. OAS1 polymorphisms are associated with susceptibility to West Nile  
486 encephalitis in horses. *PLoS One* **5**:e10537.

487

488
